# Supplementary material for: PVA-Based MMMs for Ethanol Dehydration via Pervaporation: A Comparison Study between Graphene and Graphene Oxide
Source: MDPI journal article supplement (doi:10.3390/separations9020026), 2022-01-21
Supplement: s1 [file s1]

Archive with 1 entries (1 files):
- separations-1547688-supplementary.pdf
