# Supplementary material for: PVA-Based MMMs for Ethanol Dehydration via Pervaporation: A Comparison Study between Graphene and Graphene Oxide
Source: MDPI journal article supplement (doi:10.3390/separations9020026), 2022-01-21
Supplement: s1 [file s1 › separations-1547688-supplementary.pdf]

## PVA Based Mixed Matrix Membranes for Ethanol Dehydration via Pervaporation:

### A Comparison Study between Graphene and Graphene Oxide

Xia Zhan<sup>1\*</sup>, Rui Ge<sup>1</sup>, Zhongyong Gao<sup>1</sup>, Teng Gao<sup>1</sup>, Luying Wang<sup>2</sup>, Jiding Li<sup>3</sup>

(1. Key Laboratory of Cleaner Production and Integrated Resource Utilization of China National Light Industry, Beijing Technology and Business University, Beijing 100048, PR China; 2. Beijing Key Laboratory of Lignocellulosic Chemistry, Beijing Forestry University, Beijing, 100083, China; 3. Department of Chemical Engineering, Tsinghua University, Beijing 100084, PR China)

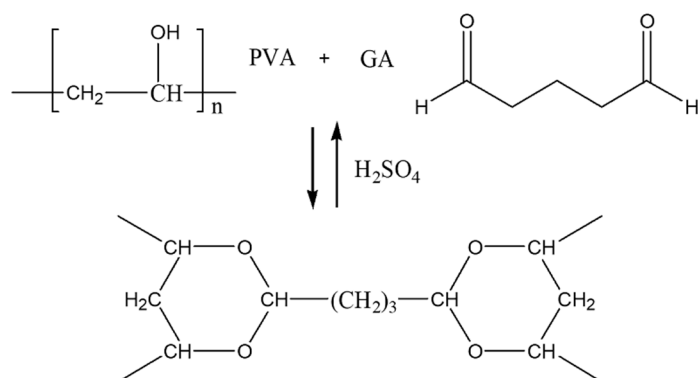

Figure S1. Chemical cross-linking of PVA with GA.

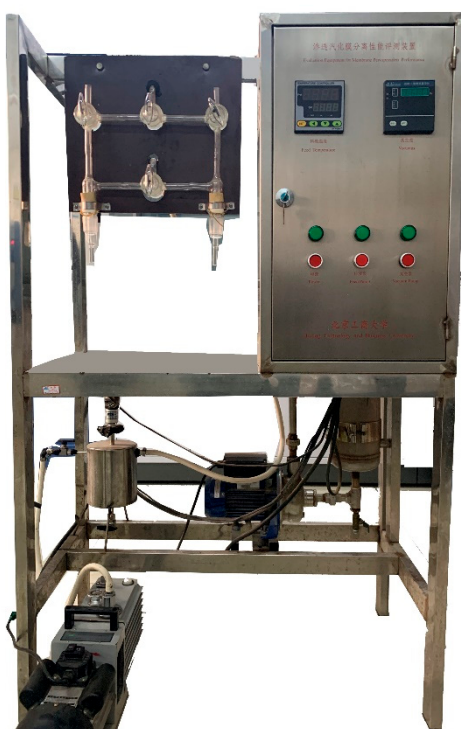

Figure S2. The photograph image of pervaporation apparatus.

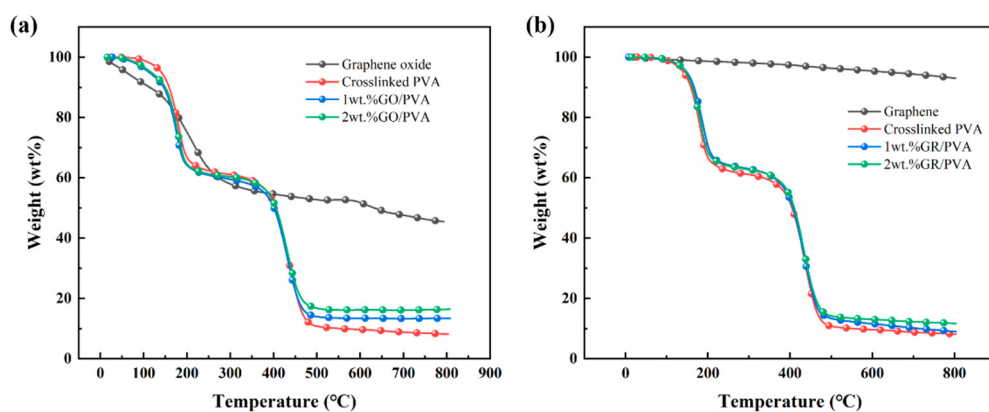

Figure S3. The TG curves for GR/PVA MMMs(a) and GO/PVA MMMs(b)

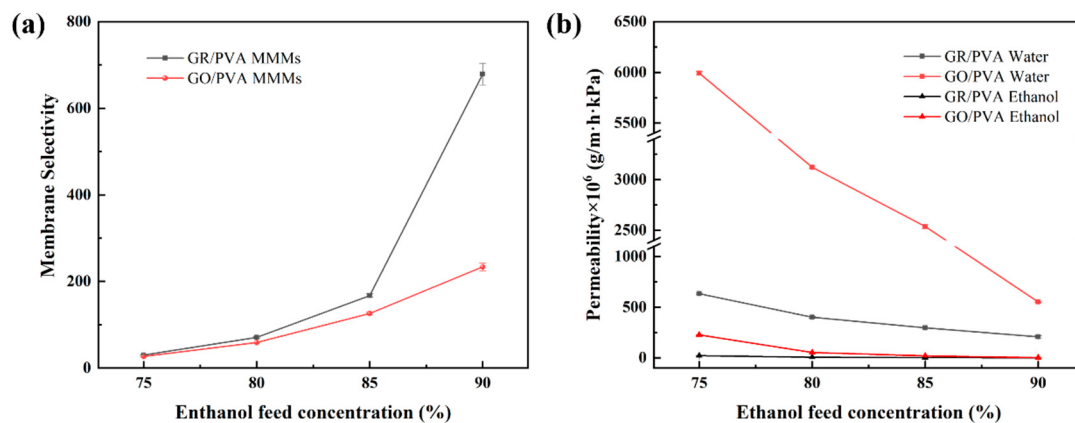

Figure S4. Effect of ethanol feed concentration on PV performance of GR/PVA and GO/PVA MMMs (a) Membrane selectivity; (b) Permeability

Table S1 Effect of feed concentration on activity coefficient, saturated vapor pressure and feed fugacity at 40 °C.

| Ethanol/water<br>mixture<br>(wt %) | Mole fraction<br>(mol %) |       | Activity coefficient |       | Saturated vapor<br>pressure (kPa) |       | Feed fugacity<br>(kPa) |       |
|------------------------------------|--------------------------|-------|----------------------|-------|-----------------------------------|-------|------------------------|-------|
|                                    | Ethanol                  | Water | Ethanol              | Water | Ethanol                           | Water | Ethanol                | Water |
|                                    |                          |       |                      |       |                                   |       |                        |       |
| 90/10                              | 0.54                     | 0.46  | 1.21                 | 1.53  |                                   |       | 11.67                  | 5.16  |
| 85/15                              | 0.61                     | 0.39  | 1.14                 | 1.65  | 17.90                             | 7.36  | 12.43                  | 4.74  |
| 80/20                              | 0.69                     | 0.31  | 1.08                 | 1.82  |                                   |       | 13.35                  | 4.14  |
| 75/25                              | 0.78                     | 0.22  | 1.04                 | 2.03  |                                   |       | 14.49                  | 3.29  |

Table S2 Effect of feed temperature on activity coefficient, saturated vapor pressure and feed fugacity of  
ethanol/water(90wt%) mixture

| Temperature<br>(°C) | Activity coefficient |       | Saturated vapor<br>pressure(kPa) |       | Feed fugacity(kPa) |       |
|---------------------|----------------------|-------|----------------------------------|-------|--------------------|-------|
|                     | Ethanol              | Water | Ethanol                          | Water | Ethanol            | Water |
| 40                  | 2.03                 | 1.04  | 17.90                            | 7.36  | 14.49              | 3.29  |
| 50                  |                      |       | 29.46                            | 12.33 | 23.85              | 5.51  |
| 60                  |                      |       | 46.84                            | 19.92 | 37.93              | 8.91  |
| 70                  |                      |       | 72.21                            | 31.17 | 58.47              | 13.93 |
